# Supplementary material for: A keyless multimodal-based user authentication scheme using generative adversarial networks
Source: PeerJ journal article supplement (doi:10.7717/peerj-cs.3360), 2025-11-18
Supplement: Code.zip [file README.pdf › Code/README.pdf]

# MATLAB Implementation of [A keyless multimodal-based user authentication scheme using a generative adversarial network]

## Overview

This repository contains the MATLAB implementation of the [A keyless multimodal-based user authentication scheme using a generative adversarial network]. The algorithms are designed to combine biometric features from multiple modalities, such as iris and face images, for a robust and secure identity verification process.

## Prerequisites

Before running the code, ensure you have the following installed:

- MATLAB (version R2024b or later)

## pseudo-Code

---

### Algorithm 1 The Proposed Feature-Level Fusion Scheme

---

**Input:** A set of  $p$  training left iris binary samples each of length  $n\{L_1, \dots, L_p\}$ , right iris binary samples each of length  $n\{R_1, \dots, R_p\}$ , face binary samples each of length  $f\{F_1, \dots, F_p\}$ ,  $N$  is the number of training epochs for the GAN model,  $\alpha$  is the learning rate for the GAN model,  $h_1$  is the generator network's hidden layer size, and  $h_2$  the discriminator network's hidden layer size.

- 1: Create  $x_i$  a template of size  $(2n+f)$  by concatenating  $L_i, R_i$ , and  $F_i$  for each sample  $i: i \in \{1, \dots, p\}$ .
- 2: Randomly select a template  $x_i: i \in \{1, \dots, p\}$ .
- 3: Create a salting key  $k$ , a permuted version of  $x_i$ .
- 4: Create a reference template  $T$  for each enrolled user using equation (9).
- 5: Create a binarized template  $Y$  for each enrolled user using equation (10).
- 6: Construct a fully connected multilayer generator network of size  $[(2n+f) \times h_1 \times (2n+f)]$ .
- 7: Construct a fully connected multilayer discriminator network of size  $[(2n+f) \times h_2 \times 1]$ .
- 8: Randomly initialize the generator network's weight matrix,  $W_g$ .
- 9: Randomly initialize the discriminator network's weight matrix,  $W_d$ .
- 10: Train the generator and the discriminator network alternatively using the back-prorogation algorithm using  $\{x_1, \dots, x_p\}$  as inputs for the generator network and  $k$  as input to the discriminator network.
- 11: After  $N$  epochs of training, retrieve the generator network's output,  $S$ .
- 12: Create the reference cancelable template for the enrolled user,  $C_{ref}$ , using equation (8).
- 13: Store  $W_g$  and  $C_{ref}$  in the system's database for the authentication phase.

**Output:** In the authentication phase, the decision is made for the test cancelable template  $C_{test}$  using equation (11).

---

---

**Algorithm 2 The Proposed GAN-based/ Decision-Level Fusion Schemes**

---

**Input:** A set of  $p$  training left iris binary samples each of length  $n$   $\{L_1, \dots, L_p\}$ , right iris binary samples each of length  $n$   $\{R_1, \dots, R_p\}$ , face binary samples each of length  $f$   $\{F_1, \dots, F_p\}$ ,  $N$  is the number of training epochs for the GAN models,  $\alpha$  is the learning rate,  $h_1$  is the generator networks' hidden layer size, and  $h_2$  is the discriminator networks' hidden layer size.

- 1: Randomly select left iris template  $l_i: i \in \{1, \dots, p\}$ .
- 2: Randomly select right iris template  $r_i: i \in \{1, \dots, p\}$ .
- 3: Randomly select face template  $f_i: i \in \{1, \dots, p\}$ .
- 4: Create salting keys  $k_l, k_r$ , and  $k_f$ , permuted versions of  $l_i, r_i$ , and  $f_i$ , respectively.
- 5: Create reference templates  $T_l, T_r$ , and  $T_f$  for each enrolled user using equation (9).
- 6: Create binarized templates  $Y_l, Y_r$ , and  $Y_f$  for each enrolled user using equation (10).
- 7: Construct three independent generator networks of sizes  $[n \times h_1 \times n]$ ,  $[n \times h_1 \times n]$ , and  $[f \times h_1 \times f]$ .
- 8: Construct three independent discriminator networks of sizes  $[n \times h_2 \times 1]$ ,  $[n \times h_2 \times 1]$ , and  $[f \times h_2 \times 1]$ .
- 9: Randomly initialize generator networks' weight matrices.
- 10: Randomly initialize discriminator networks' weight matrices.
- 11: Train the generator and the discriminator networks for each model using the back propagation algorithm using  $\{L_1, \dots, L_p\}, \{R_1, \dots, R_p\}$ , and  $\{F_1, \dots, F_p\}$  as inputs for each generator network, respectively, and  $k_l, k_r$ , and  $k_f$  as inputs to each discriminator network, respectively.
- 12: After  $N$  epochs of training, retrieve generator networks' output,  $S_l, S_r$ , and  $S_f$ .
- 13: Create reference cancelable templates for each model,  $C_{l\_ref}, C_{r\_ref}$ , and  $C_{f\_ref}$  using equation (8).
- 14: For the GAN-based fusion scheme, create  $C_{ref}$ , a size  $(2n+f)$  template by concatenating  $C_{l\_ref}, C_{r\_ref}$ , and  $C_{f\_ref}$ .
- 15: Store generator networks' weight matrices and reference template(s) in the authentication system's database

**Output:** The authentication phase for GAN-based is made for the test cancelable template  $C_{test}$  using equation (11). Authentication phase for the Decision-Level scheme is made using majority voting for the test cancelable templates  $C_{l\_test}, C_{r\_test}$ , and  $C_{f\_test}$  using equation (5).

---

## Installation

1. Clone the repository:

```
git clone https://www.mediafire.com/folder/l4mk86dr0o295/%20Implementation
```

2. Navigate to the project directory.

3. Open MATLAB and set the project directory as the working directory.

## Usage

To run the algorithm, execute the following command in the MATLAB Command Window:

1. **For running the Feature-Level Fusion Scheme:**  
`Multi_biometric_Bio_GAN_Feature_Fusion.m`
2. **For running the GAN-Based Fusion Scheme:**  
`Multi_biometrics_Bio_GAN_based_fusion.m`
3. **For running the Decision -Level Fusion Scheme:**  
`Multi_biometrics_Bio_GAN_Decision_fusion.m`

## Input

- The process starts by loading biometric data from a specified directory, which includes face, left iris, and right iris images for each user.

## Output

- Results are saved for intra-class and inter-class, tests are saved in a .mat file for later analysis (`save(path, 'hd_intra', 'hd_inter')`)
- The Performance metrics are visualized, includes [EER value, intra-class and inter-class distributions of the Hamming distances, ROC curve and plots FAR and FRR].
